# Supplementary material
Source: MDPI journal article supplement (https://www.mdpi.com/2079-9284/11/1/18)
Supplement: s1 [file s1]

# Clinical Investigation of Collagen-Based Electrospun Nanofibers for Enhanced Delivery of Skincare Ingredients

Naveen Ashok Chand, Sanjukta Duarah \*, Blaine Ah Yuk-Winters and Dhevesh Fomra

NanoLayr Ltd., 59 Mahunga Drive, Mangere Bridge, Auckland 2022, New Zealand;  
naveen.chand@nanolayr.com (N.A.C.); blaine.winters@nanolayr.com (B.A.Y.-W.);  
dhevesh.fomra@nanolayr.com (D.F.)

\* Correspondence: sanjukta.duarah@nanolayr.com; Tel.: +64-225900729

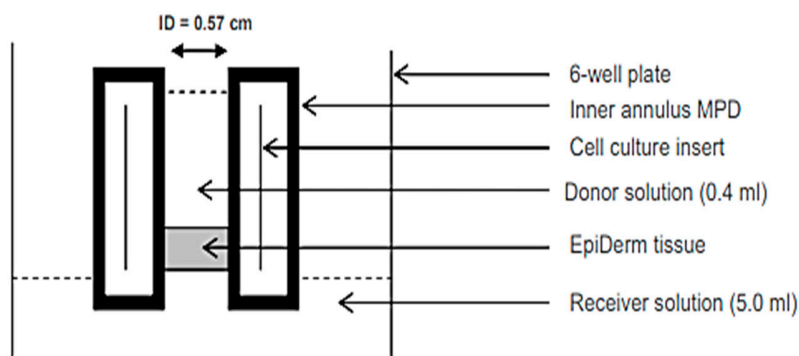

**Figure S1.** Schematic representation of a EpiDerm™ tissue tested for skin permeation according to OECD 428 standards.
